1 **Tissue Tropism and Transmission Ecology Predict Virulence of Human**  
2 **RNA Viruses**

3 Liam Brierley<sup>1\*</sup>, Amy B. Pedersen<sup>1</sup>, Mark E. J. Woolhouse<sup>1</sup>

4

5 <sup>1</sup>Centre for Immunity, Infection and Evolution, Institute of Evolutionary Biology, University of  
6 Edinburgh, Ashworth Laboratories, Kings Buildings, West Mains Road, Edinburgh EH9 3JT,  
7 UK

8 \*Corresponding author: [ac7000@coventry.ac.uk](mailto:ac7000@coventry.ac.uk)

9 \*Current address: sigma, Coventry University, Priory Street, Coventry, CV1 5FB, UK

10

11

12 Abstract

13 Novel infectious diseases continue to emerge within human populations. Predictive studies  
14 have begun to identify pathogen traits associated with emergence. However, emerging  
15 pathogens vary widely in virulence, a key determinant of their ultimate risk to public health.  
16 Here, we use structured literature searches to review the virulence of each of the 214 known  
17 human-infective RNA virus species. We then use a machine learning framework to determine  
18 whether viral virulence can be predicted by ecological traits including human-to-human  
19 transmissibility, transmission routes, tissue tropisms and host range. Using severity of clinical  
20 disease as a measurement of virulence, we identified potential risk factors using predictive  
21 classification tree and random forest ensemble models. The random forest model predicted  
22 literature-assigned disease severity of test data with 90.3% accuracy, compared to a null  
23 accuracy of 74.2%. In addition to viral taxonomy, the ability to cause systemic infection,  
24 having renal and/or neural tropism, direct contact or respiratory transmission, and limited ( $0 <$   
25  $R_0 \leq 1$ ) human-to-human transmissibility were the strongest predictors of severe disease. We  
26 present a novel, comparative perspective on the virulence of all currently known human RNA  
27 virus species. The risk factors identified may provide novel perspectives in understanding the  
28 evolution of virulence and elucidating molecular virulence mechanisms. These risk factors  
29 could also improve planning and preparedness in public health strategies as part of a  
30 predictive framework for novel human infections.

31

32 Introduction

33 The emergence of novel infectious diseases continues to represent a threat to global public  
34 health. Emerging pathogens have been defined as those newly recognised infections of  
35 humans following zoonotic transmission, or those increasing in incidence and/or geographic  
36 range [1]. High-profile examples of emerging pathogens include the discovery of the novel  
37 MERS coronavirus from cases of respiratory illness in 2012 [2], and the expansion of the  
38 range of Zika virus across the South Pacific and the Americas [3]. The emergence of  
39 previously unseen viruses means that the set of known human viruses continually increases  
40 by around 2 species per year [4,5]. Initial comparative studies identified trends among  
41 emerging human pathogens, for example, increased risk of emergence for pathogens with  
42 broad host ranges, and RNA viruses [6–9]. However, more recent comparative analyses have  
43 focused on risk factors for specific pathogen traits, such as transmissibility [10–12]. Here, we  
44 focus on understanding the ecological determinants of pathogen virulence, using all currently  
45 recognised human RNA viruses as a study system.

46

47 Emerging RNA viruses vary widely in their virulence, with some never having been associated  
48 with human disease at all. For example, Zaire ebolavirus causes severe haemorrhagic fever  
49 with outbreaks, including the 2014 West African outbreak showing case fatality ratios of ~60%  
50 or more [13,14]. In contrast, human infections with Reston ebolavirus have never exhibited  
51 any evidence of disease symptoms [15]. Applying the comparative approach to understand  
52 the ecology of virulence could offer valuable synergy with studies of emergence, towards  
53 prioritisation and preparedness in the detection of potential new human viruses [16].

54

55 Few comparative analyses have addressed the risk factors driving human pathogen virulence  
56 to date (but see [17–19]), and none have exhaustively investigated virulence across the  
57 breadth of all currently recognised human RNA viruses. Several hypotheses regarding how  
58 pathogen ecology affects virulence have been derived from theoretical models of evolution.  
59 For example, the trade-off hypothesis was developed based on the assumption that rate of  
60 transmission between individuals may increase as a function of virulence, but there will be a  
61 consequential increase in host mortality (or decrease in host recovery as the inverse of  
62 mortality). As a result, pathogen fitness will be subject to trade-off between virulence and  
63 transmissibility over a longer infectious window [20,21]. The trade-off hypothesis is highly  
64 debated as it is difficult to empirically characterise due to dependency on many other aspects  
65 of host-pathogen coevolution [22,23]. However, comparative analysis has been suggested as  
66 one method to assess evidence for a virulence-transmission trade-off [22]. Based on these  
67 core principles, we hypothesised that limited capability to transmit between humans may act  
68 as a predictive risk factor for virulence. We also note that evolutionary trade-offs will only  
69 apply to coevolved host-virus relationships and that many human viruses result from zoonotic  
70 cross-species transmission without onward transmission or adaptation. In these cases,  
71 ‘coincidental’ non-adapted virulence may result [24,25], and as above, we hypothesised that  
72 limited human-to-human transmissibility may predict higher virulence.

73

74 Transmission route may also influence the evolution of virulence. Ewald [18] suggested that  
75 vector-borne pathogens should be less constrained by costs of virulence, i.e. morbidity and

76 immobilisation of the vertebrate host does not impede transmission if it occurs through an  
77 arthropod vector. We therefore hypothesised a vector-borne transmission route would predict  
78 higher virulence.

79

80 Several studies have also suggested a link between host range and virulence. Assuming an  
81 evolutionary trade-off exists between virulence and transmission rate, higher virulence may  
82 result in pathogens with narrower host ranges following selection pressures to increase  
83 transmission rate within the specialist host(s) [19]. Furthermore, the degree of virulence in  
84 experimental infections with *Drosophila C virus* was more similar between closely related  
85 hosts [26]. Though similar ideas have not yet been formally tested for human infections,  
86 parasite infectivity correlates with phylogenetic relatedness among primates [27]. We  
87 hypothesised infection of non-human primates as a specific related host taxon would predict  
88 higher virulence. Finally, although yet unexplored via theoretical models, it may be an intuitive  
89 expectation that systemic infections present with more severe disease than local infections. A  
90 broader tissue tropism could therefore also predict higher virulence.

91

92 We aimed to determine patterns of virulence across the breadth of all known human RNA  
93 viruses. We then aimed to use predictive machine learning models to ask whether ecological  
94 traits of viruses can act as predictive risk factors for virulence in humans. Specifically, we  
95 examined hypotheses that viruses would be more highly virulent if they: lacked transmissibility  
96 within humans; had vector-borne transmission routes; had a narrow host range including non-  
97 human primates; or had greater breadth of tissue tropisms.

98 Results

99 Virulence of Human RNA Viruses

100 Following [5], as of 2015 there were 214 RNA virus species containing viruses capable of  
101 infecting humans, spanning 55 genera and 21 families (with one species unassigned to a  
102 family). Using a two-category system, 58 of these were rated as causing ‘severe’ clinical  
103 disease and 154 as ‘nonsevere’ following systematic literature review (Fig 2, see also S1  
104 Table, S2 Table). Two virus species could not be assigned a disease severity rating and were  
105 excluded from all analyses (*Hepatitis delta virus*, which is reliant on *Hepatitis B virus*  
106 coinfection; and *Primate T-lymphotropic virus 3*, which may be associated with chronic  
107 disease like other T-lymphotropic viruses, but has not been known in humans long enough for  
108 cohort observations). Disease severity differed between viral taxonomic families (Fisher’s  
109 exact, 1000 simulations,  $p < 0.001$ ), with *Arenaviridae*, *Filoviridae* and *Hantaviridae* having  
110 the highest fractions of severe-rated virus species (Fig 2). Fatalities were reported in healthy  
111 adults for 64 viruses and in vulnerable individuals only for an additional 26 viruses, whilst 8  
112 viruses rated ‘nonsevere’ had severe strains, 6 of which belonged to the family  
113 *Picornaviridae*.

114

115 Classification Tree Risk Factor Analysis

116 To find predictive risk factors for virulence, we firstly divided the 212 virus species into a  
117 training set ( $n = 181$ ) and test set ( $n = 31$ ) based on taxonomy and severity in order to  
118 minimise potential biases from trait imbalances. Using the training set, we then constructed a  
119 single classification tree that aimed to optimally classify viruses in virulence based on their

120 ecological traits. The final pruned classification tree included variables relating to  
121 transmissibility, tissue tropism and taxonomy (Fig 2). Severe disease was predicted by the  
122 model for four generalised groups: i) viruses with a neural or systemic primary tropism with  
123 limited human-to-human transmissibility (excluding orthomyxoviruses, phenuiviruses and  
124 reoviruses); ii) viruses known to have a renal tropism (primary or otherwise); iii) hantaviruses;  
125 and iv) retroviruses with sustained human-to-human transmissibility.

126

#### 127 Random Forest Risk Factor Analysis

128 Although the illustrated classification tree identified several risk factors, this represents one of  
129 many possible trees, as tree structure is dependent on the exact sampling partition between  
130 training and test data. We therefore constructed a random forest model containing 5000  
131 individual trees, each built using a bootstrapped sample of the training data and a randomly  
132 restricted subset of predictors.

133

134 Aggregated over these bootstrapped trees, the most informative predictor variables for  
135 classifying virulence were taxonomic family and primary tissue tropism (Fig 4). However,  
136 transmission route, human-to-human transmissibility level, and having a known neural or  
137 renal tropism were also relatively informative, broadly mirroring the risk factors observed in  
138 the single tree. Host range predictors were generally uninformative.

139

140 To quantify the effects of the most informative risk factors, partial dependences were  
141 extracted from the random forest, describing the marginal predicted probabilities of severe

142 virulence associated with each virus trait (Fig 5, S3 Table). Averaging across other predictors,  
143 viruses having tissue tropisms within neural, renal or systemic across multiple organ systems  
144 presented the highest risk of severe virulence, whilst respiratory and gastrointestinal tropisms  
145 presented the lowest risk. An increased probability of severe virulence was also observed for  
146 viruses transmitted by direct contact or respiratory routes, and those with known but limited  
147 human-to-human transmissibility.

148

#### 149 Model Performance in Predicting Viral Virulence

150 Although the single classification tree model predicted the training set well, it did not appear  
151 generalisable to novel data within the test set. The single tree correctly predicted virulence  
152 ratings from literature-based criteria for 24 of 31 viruses in the test set giving a resulting  
153 accuracy of 77.4% (95% confidence interval [CI]: 58.9% - 90.4%), no evident improvement on  
154 the null model assigning all viruses as nonsevere (null accuracy = 74.2%). The random forest  
155 gave better predictive accuracy, correctly predicting virulence ratings for 28 of 31 test set  
156 viruses (accuracy: 90.3%, 95% CI: 74.3% - 98.0%), significantly greater than the null  
157 accuracy (exact binomial one-tailed test,  $p = 0.025$ ). The random forest also achieved  
158 superior performance when considering sensitivity, specificity, True Skill Statistic, and the  
159 negative predictive value as a performance measure prioritising correct classification of  
160 'severe'-rated viruses (Table 1). The random forest also outperformed the classification tree in  
161 AUROC, area under the receiver operating characteristic curve (Table 1, Fig 3).

162 All misclassifications from the random forest occurred within the genus *Flavivirus* (S2 Table).

163 Within the test set, there were two flaviruses rated as severe from literature protocols that



164 were predicted to be nonsevere (*Rio Bravo virus*, *Yellow fever virus*), and one nonsevere  
165 flavivirus predicted to be severe (*Usutu virus*).

166

167 The observed predictor importances and risk factor directions were robust to constructing  
168 random forest models for subsets of viruses, removing those with low-certainty data or data  
169 from serological evidence only (S1 Fig, S2 Fig), and similar performance diagnostics were  
170 obtained (S5 Table). Redefining our virulence measure to integrate information on known  
171 fatalities and differences with subspecies or strains in an ordinal ranking system (S5 Table)  
172 did not improve predictive performance (S6 Table). Using alternative virulence  
173 measurements, the most informative variables and virus traits predicting severity showed  
174 good agreement with that of the main analysis (S3 Fig, S4 Fig) though when definitions of  
175 ‘severe’ virulence were widened, hepatic tropism became an informative predictor towards  
176 disease severity.

177 Discussion

178 We present the first comparative analysis of virulence across all known human RNA virus  
179 species to our knowledge. We find that disease severity is non-randomly distributed across  
180 virus families and that beyond taxonomy, severe disease is predicted by risk factors of tissue  
181 tropism, and to a lesser extent, transmission route and level of human-to-human  
182 transmissibility. In both the classification tree and random forest, viruses were more likely to  
183 be predicted to cause severe disease if they caused systemic infections, had neural or renal  
184 tropism, transmitted via direct contact or respiratory routes, or had limited capability to  
185 transmit between humans ( $0 < R_0 \leq 1$ ). These risk factors were robust to alternative modelling  
186 methods, alternative definitions of virulence, and exclusions of poor quality data.

187

188 Ecology and Evolution of Risk Factor Traits

189 Primary tissue tropism was the most informative non-taxonomic risk factor (Fig 4) and the first  
190 split criteria in the classification tree (Fig 2), with specific neural tropism and generalised  
191 systemic tropism predicting severe disease (Fig 5). Few evolutionary studies have directly  
192 predicted how tissue tropism should influence virulence. The identified risk factor tropisms  
193 could be explainable as a simple function of pathology occurring in multiple or sensitive  
194 tissues respectively, increasing intensity of clinical disease. However, it has been suggested  
195 that an excessive, non-adapted virulence may result if infections occur within non-target  
196 tissues that do not contribute to transmission [28]. Furthermore, the evolutionary determinants  
197 of tissue tropism themselves are not well understood [29]. Tissue tropism should be a key  
198 consideration for future comparative and evolutionary modelling efforts.

199

200 We also found viruses primarily transmitted by direct contact and respiratory routes to have a  
201 higher predicted probability of severe virulence than viruses transmitted by more indirect  
202 faecal-oral or vector-borne routes. Contrastingly, Ewald [18] reported a positive association  
203 between virulence and vector-borne transmission in comparative analyses pooling several  
204 microparasite types, including a limited range of viruses, and suggested virulence has fewer  
205 costs to viral evolutionary fitness if vector transmission can occur independent of host health  
206 and mobility. The opposite association we observe may imply that even if transmission occurs  
207 via an indirect route such as through an arthropod vector, virulence could bring ultimate  
208 fitness costs due to host mortality before encountering a vector, fomite, etc..

209

210 The relationship between virulence and transmissibility appears more complex. Firstly, the  
211 random forest model suggested a lower risk of severe virulence for viruses with sustained  
212 human-to-human transmissibility (level 4) (Fig 5). This would lend support towards  
213 hypothesised virulence-transmissibility trade-offs [20–22] and suggests that the adaptation  
214 necessary to develop efficient human-to-human transmissibility could result in attenuation of  
215 virulence in RNA viruses. Sustained transmissibility appeared to positively predict severe  
216 disease for a specific subset of four viruses in the single classification tree (Fig 2), all  
217 retroviruses causing chronic syndromes (*HIV 1 and 2*, *Primate T-lymphotropic virus 1 and 2*),  
218 which are likely subject to different evolutionary dynamics – if disease occurs after the  
219 infectious period, virulence brings fewer costs to pathogens from host mortality, essentially  
220 ‘decoupling’ from transmission [24]. We note only three non-chronic level 4 viruses rated

221 severe: *Severe acute respiratory syndrome-related coronavirus*, *Yellow fever virus*, and *Zaire*  
222 *ebolavirus*.

223

224 Secondly, cross-species infections incapable of onward transmission (sometimes termed  
225 ‘dead-end’ infections) have been predicted to result in higher virulence as without any  
226 evolutionary selection, viral phenotypes within that host will be non-adapted, i.e. a  
227 ‘coincidental’ by-product [24,25]. However, we did not observe viruses incapable of human-to-  
228 human transmissibility to be more virulent, the highest risk instead being observed for viruses  
229 with self-limited transmissibility. This may suggest that if virulence is entirely unselected in  
230 dead-end infections, ultimate levels of virulence could also feasibly turn out to be  
231 ‘coincidentally’ low.

232

233 Taxonomic family being a highly informative predictor in the random forest implies that there  
234 is a broad phylogenetic signal to virulence, but it is also highly likely that the explanatory  
235 power represents a proxy for many other phylogenetically-conserved viral traits that are  
236 challenging to implement in comparative analyses of this scale, such as variation at the  
237 proteomic, transcriptomic or genomic level; or further data beyond simple categorisations, e.g.  
238 specific arthropod vector species. Untangling these sources of variation from different scales  
239 of traits will be a critical next step in predictive modelling of viral virulence.

240

#### 241 Analytical Limitations

242 We acknowledge several limitations to the quality of our data, as with any broad comparative

243 analysis. Risk factor data was problematic or missing for certain viruses, e.g. natural  
244 transmission route for viruses only known to infect humans by accidental occupational  
245 exposure, and tissue tropism for viruses only known from serological evidence. However, the  
246 consistency of findings between alternative, stricter definitions of virulence and data subsets  
247 removing viruses with suspected data quality issues suggests scarcity of data does not bias  
248 our analyses.

249

250 Virulence also exhibits substantial variation at the sub-species level, i.e. between strains or  
251 variants. For example, severity of Lassa virus disease superficially varies with infection route  
252 and geography, though this appears to be driven by variation between genotypes [30].

253 Confirmatory analyses at a finer resolution would validate our identified risk factors, e.g.  
254 phylogenetic trait models of individual genera or species. Furthermore, clinical symptoms are  
255 also subject to traits of the host individual, e.g., immunocompetence, age, microbiome  
256 [31,32]. Our risk factor analysis brings a novel, top-down perspective on virulence at the  
257 broadest level, though caution must be exerted in extrapolating the risk factors we find to  
258 dynamics of specific infections.

259

## 260 Implications for Public Health

261 The value of predictive modelling as an inexpensive and rapid tool for risk assessments  
262 during early emergence is increasingly recognised [16]. Instances where machine learning  
263 model predictions do not match outcomes could indicate likely candidates for outcome class  
264 changes, e.g. future reservoir hosts for zoonotic disease [33]. Severe virulence was predicted

265 for one virus rated ‘nonsevere’ from literature protocols, *Usutu virus*, potentially suggesting  
266 the capability for more severe disease to be recognised in future.

267

268 However, our models have restricted function in predicting the virulence of a newly identified  
269 virus. Although taxonomy is easily accessible and applicable to give simple virulence  
270 estimates, the most informative non-taxonomic predictor, tissue tropism, is not likely to be  
271 known with confidence before clinical observations of virulence. One way to address this  
272 paucity of data lies in the potential predictability of tissue tropism from cell receptors, and  
273 more challengingly, cell receptors from viral sequence data [34], an increasingly accessible  
274 information source during early emergence following advances in genomic sequencing  
275 methods [35]. However, the exact links between tissue tropism, cell receptors, and sequences  
276 are currently a critical knowledge gap, but a potentially powerful focus for future predictive  
277 efforts. A further key area will be the possibility to directly infer virulence itself from other  
278 aspects of sequence data, e.g. genome composition biases, which have recently  
279 demonstrated the potential to predict reservoir host taxa and arthropod vectors via machine  
280 learning [36].

281

282 More widely, our analysis brings a novel focus that complements comparative models  
283 predicting other aspects of the emergence process, such as zoonotic transmission  
284 [8,9,27,33], propagation within humans [10,11] or geographic hotspots [37,38]. After  
285 continued calls for model-informed strategy, predictive studies are now beginning to shape  
286 surveillance and prevention with respect to emerging zoonoses [16,39], with virulence being

287 been suggested as a factor to direct viral surveillance [40], albeit in non-human hosts. The  
288 virulence risk factors we identify suggest that broadly targeting direct contact or respiratory  
289 transmission interfaces within ecological systems and/or tailoring detection assays towards  
290 certain virus families (e.g. *Hantaviridae*) or tissues (e.g. neural tissue) could contribute to a  
291 viable strategy to detect future virulent zoonoses.

292

### 293 Conclusion

294 This work adds to the comparative and predictive modelling efforts surrounding emerging  
295 infectious diseases. Here, we contribute a novel focus in ecological predictors of virulence of  
296 human RNA viruses, which can be combined in holistic frameworks with other models such  
297 as those predicting emergence dynamics. As a predictive model, the featured random forest  
298 offers valuable inference into the evolutionary determinants of virulence in newly emerging  
299 infections. We propose that future predictive studies and preparedness initiatives with respect  
300 to emerging diseases should carefully consider potential for human virulence.

301 Materials and Methods

302 Data Collection

303 For each of the 214 recognised human-infective RNA virus species following standardised  
304 data compilation efforts and critical assessment protocols [5], data on virulence and potential  
305 risk factors were collected via a systematic search and review of clinical and epidemiological  
306 literature. The following were consulted in turn: clinical virology textbooks [41–43]; references  
307 from the dataset described by [5]; literature searches using Google Scholar (search terms: 1)  
308 [virus name] AND human, 2) [virus name] AND human AND case, 3) [virus name] AND  
309 human AND [fatal\* OR death], 4) [virus name] AND human AND [tropi\* or isolat\*]. Searches 3  
310 and 4 were carried out only when fatality or tropism data respectively were not already found  
311 from previous sources. Data collection and virus name search terms included the full species  
312 name, any synonyms or subspecies (excluding vaccine strains) and the standard virus  
313 abbreviation as given by ICTV Online Virus Taxonomy [44].

314

315 Although many possible measurements of virulence have been proposed [45,46], even simple  
316 metrics like case fatality ratio (CFR) have not been calculated for the majority of human RNA  
317 virus species. Therefore, virulence was rated using a simple two-category measure of severity  
318 of typical disease in humans. We rated viruses as ‘severe’ if they firstly had  $\geq 5\%$  CFR where  
319 data was available (159/214 viruses including those with zero CFR), otherwise, we rated  
320 viruses as ‘severe’ if they had frequent reports of hospitalisation, were associated with  
321 significant morbidity from certain conditions (haemorrhagic fever, seizures/coma, cirrhosis,  
322 AIDS, hantavirus pulmonary syndrome, HTLV-associated myelopathy) or were explicitly



323 described as “severe” or “causing severe disease” (S1 Table, S2 Table). We rated viruses as  
324 ‘nonsevere’ if none of these conditions were met. Note that this led to ‘nonsevere’ ratings for  
325 some viruses with clinically severe, but rare syndromes, e.g. Dengue virus can cause  
326 haemorrhagic dengue fever, though this is much rarer than typical acute dengue fever  
327 [41,42]. To address this, data were also collected on whether the virus has caused fatalities in  
328 vulnerable individuals (defined as age 16 and below or 60 and above, immunosuppressed,  
329 having co-morbidities, or otherwise cited as being ‘at-risk’ by sources for specific viruses) and  
330 in healthy adults, and whether any ‘nonsevere’ virus has atypically severe strains (for  
331 example, most infections with viruses within the species *Human enterovirus C* cause mild  
332 disease; however, poliovirus, which causes severe paralytic disease, is also classified under  
333 this species). These were examined both individually and within a composite six-rank system  
334 (S5 Table).

335

336 Data were compiled for four main risk factors: transmission route(s) and tissue tropisms,  
337 sourced from literature search exercises as described; and extent of human-to-human  
338 transmissibility and host range, sourced directly from [5]. Although evolutionary theories also  
339 predict virulence to vary with other traits, e.g. environmental survivability [47], paucity of data  
340 or nestedness within taxonomic family prevented their inclusion in our analysis. Transmission  
341 route was defined as the primary route the virus is transmitted by, classified as either vector-  
342 borne (excluding mechanical transmission), direct contact, faecal-oral or respiratory  
343 transmission. Tissue tropism was specified the primary organ system the virus typically  
344 infects or targets, classified as either neural, gastrointestinal, hepatic, respiratory, circulatory,

345 vascular, or ‘systemic’ (primary tropism within multiple organ systems). We accepted isolation  
346 of the virus, viral proteins or genetic material, or diagnostic symptoms of the virus (such as  
347 characteristic histological damage) as evidence of infection within an organ system but did not  
348 accept generalised symptoms such as inflammation. However, many human viruses were  
349 isolated from blood with no further evidence of any specific tissue tropisms ( $n = 69$ ).

350 Therefore, we also included an additional ‘viraemia’ category in this variable to indicate only  
351 blood presence was known. Binary variables were also constructed denoting whether viruses  
352 were ever known to utilise a) more than one transmission route/tissue tropism, and b) each  
353 individual transmission route and tropism, including additional categories that were never  
354 among the primary routes/tropisms (food-borne and vertical transmission; renal, cardiac, joint,  
355 reproductive, sensory, skin, muscular and endocrine tropism).

356

357 Human-to-human transmissibility was specified using infectivity/transmissibility levels, based  
358 on previous conceptual models and a systematic compilation and review of evidence [4,5,12].  
359 Level 2 denotes a virus capable of infecting humans but not transmitting between humans ( $R_0$   
360 = 0), level 3 denotes a virus with limited human-to-human transmissibility ( $0 < R_0 \leq 1$ ); and

361 level 4 denotes a virus with sustained human-to-human transmissibility ( $R_0 \geq 1$ ). Host range  
362 was specified as either ‘narrow’ (infection known only within humans or humans plus non-  
363 human primates) or ‘broad’ (infection known in mammals or animals beyond primates) [5].  
364 Binary variables were also sourced as to whether infection was known within a) humans only,  
365 b) non-human primates, c) other mammals and d) birds. All virulence and risk factor data

366 pertained to natural or unintentional artificially-acquired human infection only and data from  
367 intentional human infection, animal infection, and *in vitro* infection were not considered. Viral  
368 taxonomy was included in analyses by specifying both genome type and taxonomic family as  
369 predictors. All virulence and risk factor data are available via Figshare [48].

370

### 371 Machine Learning Risk Factor Analysis

372 Firstly, the 212 retained virus species were split into a training set for model fitting and test set  
373 for model evaluation at an approximate 75:25 ratio using stratified random sampling based on  
374 taxonomic family and virulence rating. Fisher's exact tests confirmed equal representation of  
375 families ( $p = 0.991$ ) and virulence ratings ( $p > 0.999$ ) between training and test data.

376 Comparative risk factor analyses were firstly carried out by constructing a classification tree  
377 using the R package 'rpart' v4.1-11 [49]. Classification trees are a simple form of machine  
378 learning models that aim to optimally classify data points into their correct category of  
379 outcome variable based on a structure of binary predictor splits. Tree-based methods are  
380 well-suited for comparative analyses where confounding often results from taxonomic signal  
381 or suites of otherwise co-occurring traits as their high structure can intuitively fit complex non-  
382 linear interactions and local effects.

383

384 A tree model was fitted to the training set to predict virulence ratings by 'recursive  
385 partitioning', the repeated splitting of the dataset using every possible binary permutation of  
386 each predictor, and retaining the split that minimises the Gini impurity [50], defined as  
387  $1 - \sum_{i=1}^n p(x_i)^2$  for outcome variable  $x$  with  $n$  possible ratings and  $p(x_i)$  denoting proportion of

388 data with rating  $i$ , which is equal to zero for perfectly separated data. To prevent overfitting,  
389 the tree was pruned back to the optimal branching size, taken as most common consensus  
390 size over 1000 repeats of 10-fold cross-validation. To validate the predictive power of the  
391 classification tree, predictions of virulence rating were generated when applied to the test set.  
392 Tree accuracy was then calculated comparing the proportion of correct predictions compared  
393 to literature-assigned ratings (assuming these to be 100% accurate as the ‘gold standard’ or  
394 ‘ground truth’). As virulence ratings were imbalanced (i.e. only a minority of viruses cause  
395 severe disease, so correct nonsevere classifications are likely to be achieved by chance),  
396 accuracy was directly compared to the null model, i.e. a model with no predictors that  
397 predicted ‘nonsevere’ for all viruses. Additional diagnostics of interest (sensitivity, specificity,  
398 negative predictive value, and True Skill Statistic [60]) were also obtained.

399

400 Although classification trees have the advantage of presenting an interpretable schematic of  
401 risk factor effects and directions, individual tree structures may be sensitive to particular data  
402 points and have no intuitive measures of uncertainty. Therefore, we constructed a random  
403 forest, an ensemble collection of a large number of bootstrapped classification trees [51].  
404 Having many predictor variables compared to the relatively limited and fixed number of  
405 human-infective RNA virus species, random forests handle such ‘large p, small n’ data  
406 architecture much more easily than traditional regression frameworks [52]. Missing data in all  
407 predictors was imputed using the R package ‘missForest’ v1.4 [53]. Then, using the R  
408 package ‘randomForest’ v4.6-12 [53], a random forest was created containing 5000 individual  
409 trees, each built upon a bootstrapped sample of the training data and restricted to test a

410 randomly selected subset of predictors ( $k = 5$ ) at each split during construction and  
411 convergence confirmed by inspection. Predictive power of the random forest model was  
412 evaluated using the test set as for the classification tree and receiver operating characteristic  
413 curves were visualised and area under curves calculated to directly compare the two machine  
414 learning methodologies.

415

416 Due to their high structuring, random forest models cannot give a simple parametric predictor  
417 effect size and direction (e.g., an odds ratio). Instead, potential virulence risk factors were  
418 evaluated using two metrics: variable importance and partial dependence. Variable  
419 importance is calculated as the mean decrease in Gini impurity following tree splits on the  
420 predictor and can be considered as how informative the risk factor was towards correctly  
421 predicting virulence. Partial dependence is calculated as the mean relative change in log-  
422 odds of predicting severe virulence, which were converted to predicted probabilities of  
423 severity associated with each risk factor. Partial dependences describe marginal effects  
424 averaging across any influence of other predictors and as such, a single estimate may not  
425 reflect any complex risk factor interactions. Therefore, to test hypotheses regarding virulence  
426 risk factors, we present both random forest partial dependences and the less robust but more  
427 accessible single classification tree for its ease of interpretation in risk factor structure, and  
428 directly compare the statistical validity of both methods by plotting receiver operating  
429 characteristic curves. All modelling was carried out in R v 3.4.3 [54], with a supporting R script  
430 available via Figshare [48].

431

432 Acknowledgements

433 We thank Jarrod Hadfield, Samantha Lycett, and Daniel Streicker for helpful discussion, and  
434 Alex Bhattacharya, Christopher McCaffery, David McCulloch, Conor O'Halloran, Claire Taylor  
435 and Feifei Zhang for assistance in data collection.

436 References

- 437 1. Morse SS. Factors in the emergence of infectious diseases. *Emerg Infect Dis.* 1995;1: 7–  
438 15.
- 439 2. Zaki AM, van Boheemen S, Bestebroer TM, Osterhaus ADME, Fouchier RAM. Isolation  
440 of a novel coronavirus from a man with pneumonia in Saudi Arabia. *N Engl J Med.* 2012;367:  
441 1814–1820. doi:10.1056/NEJMoa1211721
- 442 3. Gatherer D, Kohl A. Zika virus: a previously slow pandemic spreads rapidly through the  
443 Americas. *J Gen Virol.* 2016;97: 269–73.
- 444 4. Woolhouse MEJ, Scott F, Hudson Z, Howey R, Chase-Topping M. Human viruses:  
445 discovery and emergence. *Philos Trans R Soc B Biol Sci.* 2012;367: 2864–2871.  
446 doi:10.1098/rstb.2011.0354
- 447 5. Woolhouse MEJ, Brierley L. Epidemiological characteristics of human-infective RNA  
448 viruses. *Sci Data.* 2018;5: 180017. doi:10.1038/sdata.2018.17
- 449 6. Woolhouse MEJ, Gowtage-Sequeria S. Host range and emerging and reemerging  
450 pathogens. *Emerg Infect Dis.* 2005;11: 1842–1847. doi:10.3201/eid1112.050997
- 451 7. Taylor LH, Latham SM, Woolhouse MEJ. Risk factors for human disease emergence.  
452 *Philos Trans R Soc Lond B Biol Sci.* 2001;356: 983–989.
- 453 8. Cleaveland S, Laurenson MK, Taylor LH. Diseases of humans and their domestic  
454 mammals: pathogen characteristics, host range and the risk of emergence. *Philos Trans R*  
455 *Soc Lond B Biol Sci.* 2001;356: 991–999.
- 456 9. Olival KJ, Hosseini PR, Zambrana-Torrel C, Ross N, Bogich TL, Daszak P. Host and  
457 viral traits predict zoonotic spillover from mammals. *Nature.* 2017;546: 646–650.

458 doi:10.1038/nature22975

459 10. Geoghegan JL, Senior AM, Giallonardo FD, Holmes EC. Virological factors that increase  
460 the transmissibility of emerging human viruses. *Proc Natl Acad Sci.* 2016;113: 4170–4175.

461 doi:10.1073/pnas.1521582113

462 11. Johnson CK, Hitchens PL, Evans TS, Goldstein T, Thomas K, Clements A, et al.

463 Spillover and pandemic properties of zoonotic viruses with high host plasticity. *Sci Rep.*

464 2015;5: 14830. doi:10.1038/srep14830

465 12. Woolhouse MEJ, Brierley L, McCaffery C, Lycett S. Assessing the Epidemic Potential of  
466 RNA and DNA Viruses. *Emerg Infect Dis.* 2016;22: 2037–2044. doi:10.3201/eid2212.160123

467 13. Feldmann H, Geisbert TW. Ebola haemorrhagic fever. *The Lancet.* 2011;377: 849–862.

468 doi:10.1016/S0140-6736(10)60667-8

469 14. Focosi D, Maggi F. Estimates of Ebola virus case-fatality ratio in the 2014 West African  
470 outbreak. *Clin Infect Dis.* 2015;60: 829. doi:10.1093/cid/ciu921

471 15. Morikawa S, Saijo M, Kurane I. Current knowledge on lower virulence of Reston Ebola

472 virus. *Comp Immunol Microbiol Infect Dis.* 2007;30: 391–398. doi:10.1016/j.cimid.2007.05.005

473 16. Morse SS, Mazet JA, Woolhouse MEJ, Parrish CR, Carroll D, Karesh WB, et al.

474 Prediction and prevention of the next pandemic zoonosis. *The Lancet.* 2012;380: 1956–1965.

475 doi:10.1016/S0140-6736(12)61684-5

476 17. Walther BA, Ewald PW. Pathogen survival in the external environment and the evolution

477 of virulence. *Biol Rev.* 2004;79: 849–869. doi:10.1017/S1464793104006475

478 18. Ewald PW. Host-parasite relations, vectors, and the evolution of disease severity. *Annu*

479 *Rev Ecol Syst.* 1983;14: 465–485. doi:10.2307/2096982



- 480 19. Leggett HC, Buckling A, Long GH, Boots M. Generalism and the evolution of parasite  
481 virulence. *Trends Ecol Evol.* 2013;28: 592–596. doi:10.1016/j.tree.2013.07.002
- 482 20. Anderson RM, May RM. Coevolution of hosts and parasites. *Parasitology.* 1982;85: 411–  
483 426. doi:10.1017/S0031182000055360
- 484 21. Bremermann HJ, Pickering J. A game-theoretical model of parasite virulence. *J Theor*  
485 *Biol.* 1983;100: 411–426. doi:10.1016/0022-5193(83)90438-1
- 486 22. Alizon S, Hurford A, Mideo N, Van Baalen M. Virulence evolution and the trade-off  
487 hypothesis: history, current state of affairs and the future. *J Evol Biol.* 2009;22: 245–259.  
488 doi:10.1111/j.1420-9101.2008.01658.x
- 489 23. Ebert D, Bull JJ. Challenging the trade-off model for the evolution of virulence: is  
490 virulence management feasible? *Trends Microbiol.* 2003;11: 15–20. doi:10.1016/S0966-  
491 842X(02)00003-3
- 492 24. Bull JJ. Perspective: virulence. *Evolution.* 1994;48: 1423–1437. doi:10.2307/2410237
- 493 25. Levin B., Svanborg Edén C. Selection and evolution of virulence in bacteria: an  
494 ecumenical excursion and modest suggestion. *Parasitology.* 1990;100: S103–S115.  
495 doi:10.1017/S0031182000073054
- 496 26. Longdon B, Hadfield JD, Day JP, Smith SCL, McGonigle JE, Cogni R, et al. The causes  
497 and consequences of changes in virulence following pathogen host shifts. *PLoS Pathog.*  
498 2015;11: e1004728. doi:10.1371/journal.ppat.1004728
- 499 27. Pedersen AB, Davies TJ. Cross-species pathogen transmission and disease emergence  
500 in primates. *EcoHealth.* 2009;6: 496–508.
- 501 28. Levin BR, Bull JJ. Short-sighted evolution and the virulence of pathogenic

- 502 microorganisms. *Trends Microbiol.* 1994;2: 76–81. doi:10.1016/0966-842X(94)90538-X
- 503 29. Taber SW, Pease CM. Paramyxovirus phylogeny: tissue tropism evolves slower than
- 504 host specificity. *Evolution.* 1990;44: 435–438. doi:10.2307/2409419
- 505 30. Howard CR. Arenaviruses. In: Zuckerman AJ, Banatvala JE, Schoub BD, Griffiths PD,
- 506 Mortimer P, editors. *Principles and practice of clinical virology.* John Wiley & Sons, Ltd; 2009.
- 507 pp. 733–754.
- 508 31. Mackinnon MJ, Gandon S, Read AF. Virulence evolution in response to vaccination: The
- 509 case of malaria. *Vaccine.* 2008;26, Supplement 3: C42–C52.
- 510 doi:10.1016/j.vaccine.2008.04.012
- 511 32. Franco DJ, Vago AR, Chiari E, Meira FCA, Galvão LMC, Machado CRS. *Trypanosoma*
- 512 *cruzi*: mixture of two populations can modify virulence and tissue tropism in rat. *Exp Parasitol.*
- 513 2003;104: 54–61.
- 514 33. Han BA, Schmidt JP, Bowden SE, Drake JM. Rodent reservoirs of future zoonotic
- 515 diseases. *Proc Natl Acad Sci.* 2015;112: 7039–7044. doi:10.1073/pnas.1501598112
- 516 34. Woolhouse M. Sources of human viruses. *Science.* 2018;362: 524–525.
- 517 doi:10.1126/science.aav4265
- 518 35. Woolhouse MEJ, Rambaut A, Kellam P. Lessons from Ebola: Improving infectious
- 519 disease surveillance to inform outbreak management. *Sci Transl Med.* 2015;7: 307rv5.
- 520 doi:10.1126/scitranslmed.aab0191
- 521 36. Babayan SA, Orton RJ, Streicker DG. Predicting reservoir hosts and arthropod vectors
- 522 from evolutionary signatures in RNA virus genomes. *Science.* 2018;362: 577–580.
- 523 doi:10.1126/science.aap9072

- 524 37. Jones KE, Patel NG, Levy MA, Storeygard A, Balk D, Gittleman JL, et al. Global trends in  
525 emerging infectious diseases. *Nature*. 2008;451: 990–993.
- 526 38. Allen T, Murray KA, Zambrana-Torrel C, Morse SS, Rondinini C, Marco MD, et al.  
527 Global hotspots and correlates of emerging zoonotic diseases. *Nat Commun*. 2017;8: 1124.  
528 doi:10.1038/s41467-017-00923-8
- 529 39. Daszak P. A call for “smart surveillance”: a lesson learned from H1N1. *EcoHealth*.  
530 2009;6: 1–2.
- 531 40. Levinson J, Bogich TL, Olival KJ, Epstein JH, Johnson CK, Karesh W, et al. Targeting  
532 surveillance for zoonotic virus discovery. *Emerg Infect Dis*. 2013;19: 743–747.  
533 doi:10.3201/eid1905.121042
- 534 41. Knipe DM, Howley PM. *Fields virology*, 5th Edition. Lippincott Williams & Wilkins; 2007.
- 535 42. Zuckerman AJ, Banatvala JE, Griffiths P, Schoub B, Mortimer P. *Principles and practice*  
536 *of clinical virology*. John Wiley & Sons; 2009.
- 537 43. Richman DD, Whitley RJ, Hayden FG. *Clinical virology*. John Wiley & Sons; 2009.
- 538 44. ICTV. *The Classification and Nomenclature of Viruses. The Online (10th) Report of the*  
539 *ICTV*. [Internet]. 2017. Available: [https://talk.ictvonline.org/ictv-reports/ictv\\_online\\_report/](https://talk.ictvonline.org/ictv-reports/ictv_online_report/)
- 540 45. Nathanson N, Gonzalez-Scarano F, Nathanson N. *Viral virulence. Viral Pathogenesis*  
541 *and Immunity*. Academic Press; 2007. pp. 113–129.
- 542 46. Day T. On the evolution of virulence and the relationship between various measures of  
543 mortality. *Proc R Soc B Biol Sci*. 2002;269: 1317–1323. doi:10.1098/rspb.2002.2021
- 544 47. Bonhoeffer S, Lenski RE, Ebert D. The curse of the pharaoh: the evolution of virulence in  
545 pathogens with long living propagules. *Proc R Soc Lond B Biol Sci*. 1996;263: 715–721.

- 546 48. Brierley L, Pedersen A, Woolhouse M. Data and supporting R script for: Tissue Tropism  
547 and Transmission Ecology Predict Virulence of Human RNA Viruses [Internet]. figshare.  
548 2019. doi:10.6084/m9.figshare.7406441.v1
- 549 49. Therneau TM, Atkinson B, Ripley B. rpart: Recursive partitioning and regression Trees. R  
550 package version 4.1-8. 2014;
- 551 50. De'ath G, Fabricius KE. Classification and regression trees: a powerful yet simple  
552 technique for ecological data analysis. *Ecology*. 2000;81: 3178–3192.
- 553 51. Breiman L. Random forests. *Mach Learn*. 2001;45: 5–32. doi:10.1023/A:1010933404324
- 554 52. Genuer R, Poggi J-M, Tuleau C. Random Forests: some methodological insights. *ArXiv*  
555 Prepr ArXiv08113619. 2008;
- 556 53. Stekhoven DJ, Bühlmann P. MissForest—non-parametric missing value imputation for  
557 mixed-type data. *Bioinformatics*. 2012;28: 112–118. doi:10.1093/bioinformatics/btr597
- 558 54. R Development Core Team. R: A language and environment for statistical computing. R  
559 Foundation for Statistical Computing, Vienna, Austria. [http://www. R-project. org](http://www.R-project.org); 2011.
- 560

561 Figure Captions

562 **Fig 1. Virulence of currently known human RNA viruses with respect to taxonomy.**

563 Number of known human RNA virus species split by ICTV taxonomic family. Shading denotes  
564 disease severity rating.

565

566 **Fig 2. Final pruned classification tree predicting disease severity for 181 human RNA**  
567 **viruses.**

568 Final classification tree structure predicting virulence. Viruses begin at the top and are  
569 classified according to split criteria (white boxes) until reaching terminal nodes with the  
570 model's prediction of disease severity, and the fraction of viruses following that path correctly  
571 classified, based on literature-assigned ratings (shaded boxes). 'Tp: primary' denotes primary  
572 tissue tropism, 'Tr level' denotes level of human-to-human transmissibility, and 'Tp: renal.'  
573 denotes having a known renal tissue tropism.

574

575 **Fig 3. Receiver operating characteristic curve for tree-based machine learning models.**

576 Plotted model predictive performance for the single classification tree (bold black line) and the  
577 random forest (bold red line) models when applied to the test set. Y axis denotes sensitivity  
578 (or true positive rate; proportion of viruses rated 'severe' by literature protocol that were  
579 correctly predicted as 'severe' by the model), and X axis denotes 1 – specificity (or false  
580 positive rate; proportion of viruses rated 'nonsevere' by literature protocol that were incorrectly  
581 predicted as 'severe' by the model). Dashed black line indicates null expectation (i.e. a model

582 with no discriminatory power). Model profiles further toward the top left indicate a better  
583 predictive performance.

584

585 **Fig 4. Variable importances from the random forest model.**

586 Importance of each predictor variable across the 5000 bootstrapped trees within the random  
587 forest, calculated as the mean decrease in Gini impurity following a tree split based on that  
588 predictor and scaled against the most informative predictor (taxonomic family) to give a  
589 relative measure. ‘Tp’ denotes tissue tropism predictor, ‘Tr’ denotes transmission route  
590 predictor, ‘Tr level’ denotes level of human-to-human transmissibility, and ‘H’ denotes host  
591 range predictor.

592

593 **Fig 5. Partial dependences from the random forest model in predicting severe**  
594 **virulence.**

595 Predicted probability of classifying virulence as ‘severe’ for each of the most informative risk  
596 factors (primary tissue tropism, any known neural tropism, any known renal tropism, level of  
597 human-to-human transmissibility, and primary transmission route). Probabilities given are  
598 marginal, i.e. averaging over any effects of other predictors. Dashed line denotes raw  
599 prevalence of ‘severe’ virulence rating among the training dataset.

600

601 **Tables**

602 **Table 1. Predictive performance metrics for classification tree and random forest**  
603 **model.**

604 Sensitivity, specificity, NPV (negative predictive value; proportion of ‘nonsevere’ predictions  
605 that correctly matched literature rating), TSS (true skill statistic; sensitivity + specificity – 1)  
606 and AUROC (area under receiver operating characteristic curve) for predictive model  
607 methods applied to predict virulence of 31 viruses within the test set.

608

---

| <b>Model</b>        | <b>Sensitivity</b> | <b>Specificity</b> | <b>NPV</b> | <b>TSS</b> | <b>AUROC</b> |
|---------------------|--------------------|--------------------|------------|------------|--------------|
| Classification tree | 0.625              | 0.826              | 0.864      | 0.451      | 0.636        |
| Random forest       | 0.750              | 0.957              | 0.917      | 0.707      | 0.957        |

---

609

610

611 Supporting Information Captions

612 **S1 Table. Virulence literature rating data for human RNA virus training dataset.**

613 Virulence data for the 181 virus species in the training set, ordered by genome type and  
614 taxonomy, including disease severity rating and supporting criteria for viruses rated ‘severe’,  
615 whether virus is known to have caused fatalities in vulnerable individuals and/or otherwise  
616 healthy adults, and whether virus is known to have ‘severe’ strains if species is rated  
617 ‘nonsevere’. CFR = Case fatality ratio, HPS = Hantavirus pulmonary syndrome, HFRS =  
618 Hantavirus haemorrhagic fever with renal syndrome, HTLV = Human T-lymphotropic virus,  
619 AIDS = Acquired immunodeficiency syndrome.

620

621 **S2 Table. Virulence literature rating data and predictions for human RNA virus test**  
622 **dataset.**

623 Virulence data for 31 virus species in the test set, ordered by genome type and taxonomy,  
624 whether virus is known to have caused fatalities in vulnerable individuals and/or otherwise  
625 healthy adults, and whether virus is known to have ‘severe’ strains if species is rated  
626 ‘nonsevere’. Both disease severity rating/supporting criteria following the literature protocol  
627 given in the main text, and predicted probability of severe disease from the random forest  
628 model are given. Bold type denotes where predictions do not match literature-based ratings.  
629 CFR = Case fatality ratio, HPS = Hantavirus pulmonary syndrome.

630



631 **S3 Table. Partial dependence from the random forest model for all predictor variables.**

632 Partial dependence given as marginal relative change in log-odds and predicted probability of  
633 classifying virulence as ‘severe’ from the random forest for all predictor variables.

634

635 **S4 Table. Diagnostics of random forest models using stringent data subsets.**

636 Predictive performance metrics of random forest models applied to datasets excluding viruses  
637 with low-certainty data (n denotes number of viruses excluded). In each case, data were  
638 randomly resampled using stratification upon taxonomic family and virulence rating, resulting  
639 in differing training and test sets from the main analysis. Otherwise, random forest  
640 methodology follows that of Materials & Methods.

641

642 **S5 Table. Six-rank system of classifying virulence for human RNA viruses.**

643 Six-rank system of classifying human RNA virus virulence with available data (specifically,  
644 severity rating from main text, fatalities in vulnerable individuals and healthy adults, and  
645 severe strains), along with example viruses and number of viruses fitting each exclusive  
646 rank’s criteria.

647

648 **S6 Table. Diagnostics of random forest models predicting alternative metrics of  
649 virulence.**

650 Predictive performance metrics of random forest models predicting alternative virulence

651 measures using different two-category definitions of ‘severe’ (n denotes number of viruses  
652 considered ‘severe’ using that definition). Vulnerable individuals are defined as those age 16  
653 and below, age 60 and above, immunosuppressed, having co-morbidities, or otherwise cited  
654 as being ‘at-risk’. Ranks follow those given in Table S5. Otherwise, random forest  
655 methodology follows that of Materials & Methods.

656 **S1 Fig. Variable importances from random forest models using stringent data subsets.**

657 Variable importance for virulence risk factors from random forest models applied to datasets  
658 excluding a) viruses only known to infect humans from serological evidence (n = 36), b)  
659 viruses with < 20 recognised human infections (n = 55), and c) viruses with poor data quality  
660 in at least one predictor (n = 71). Variable importance is calculated as the relative mean  
661 decrease in Gini impurity scaled against the most informative predictor within each model,  
662 alongside importances from the main analysis for comparison. 'Tp' denotes tissue tropism  
663 predictor, 'Tr' denotes transmission route predictor, 'Tr level' denotes level of human-to-  
664 human transmissibility, and 'H' denotes host range predictor.

665

666 **S2 Fig. Partial dependences from random forest models using stringent data subsets.**

667 Predicted probability of classifying virulence as 'severe' for each of the most informative risk  
668 factors from random forest models applied to datasets excluding a) viruses only known to  
669 infect humans from serological evidence (n = 36), b) viruses with < 20 recognised human  
670 infections (n = 55), and c) viruses with poor data quality in at least one predictor (n = 71),  
671 alongside predicted probabilities from the main analysis for comparison. Probabilities given  
672 are marginal, i.e. averaging over any effects of other predictors. As each data subset required  
673 random resampling of the training and test data, note that the raw prevalence of 'severe'  
674 virulence differed between each model (see S4 Table).

675

676 **S3 Fig. Variable importances from random forest models using stringent data subsets.**

677 Variable importance for virulence risk factors from random forest models predicting alternative  
678 virulence measures using different two-category definitions of ‘severe’, calculated as the  
679 relative mean decrease in Gini impurity scaled against the most informative predictor within  
680 each model, alongside importances from the main analysis for comparison. ‘Tp’ denotes  
681 tissue tropism predictor, ‘Tr’ denotes transmission route predictor, ‘Tr level’ denotes level of  
682 human-to-human transmissibility, and ‘H’ denotes host range predictor.

683

684 **S4 Fig. Partial dependences from random forest models using stringent data subsets.**

685 Predicted probability of classifying virulence as ‘severe’ in alternative virulence measures for  
686 each of the most informative risk factors from random forest models, alongside predicted  
687 probabilities from the main analysis for comparison. Probabilities given are marginal, i.e.  
688 averaging over any effects of other predictors. As each measurement used a different two-  
689 category definition of ‘severe’, note that the raw prevalence of ‘severe’ virulence differed  
690 between each model (see S6 Table).

No. human virus species

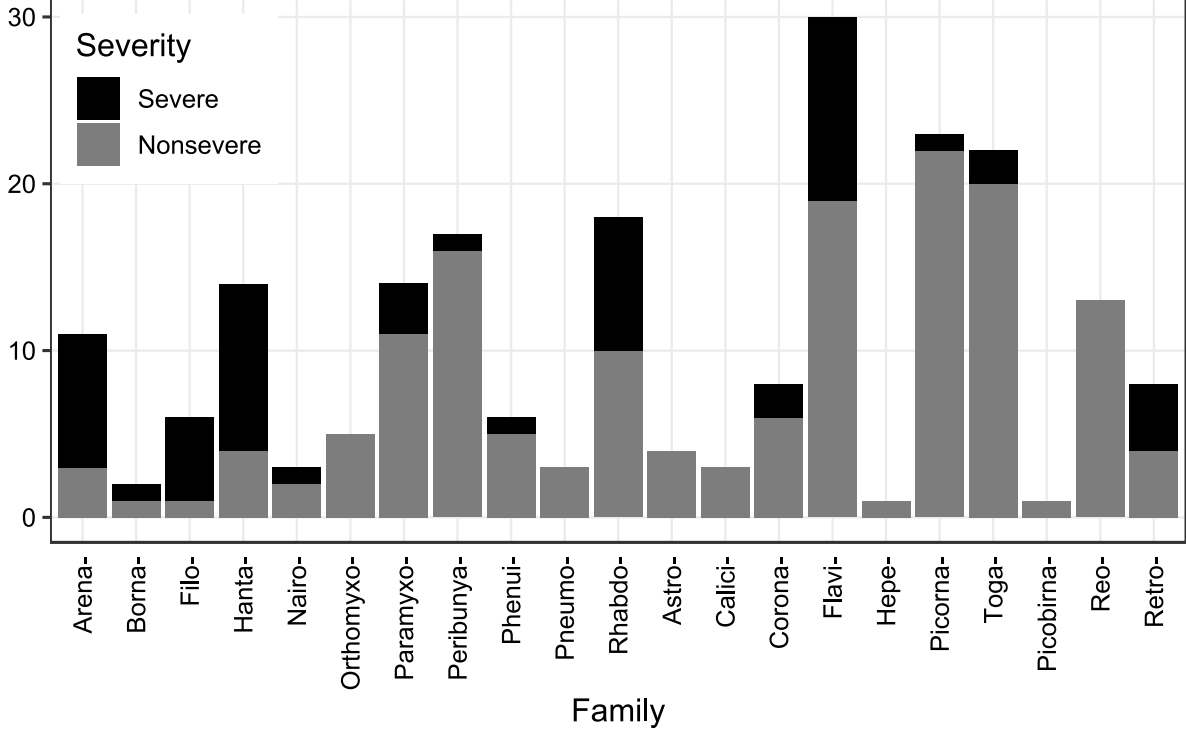

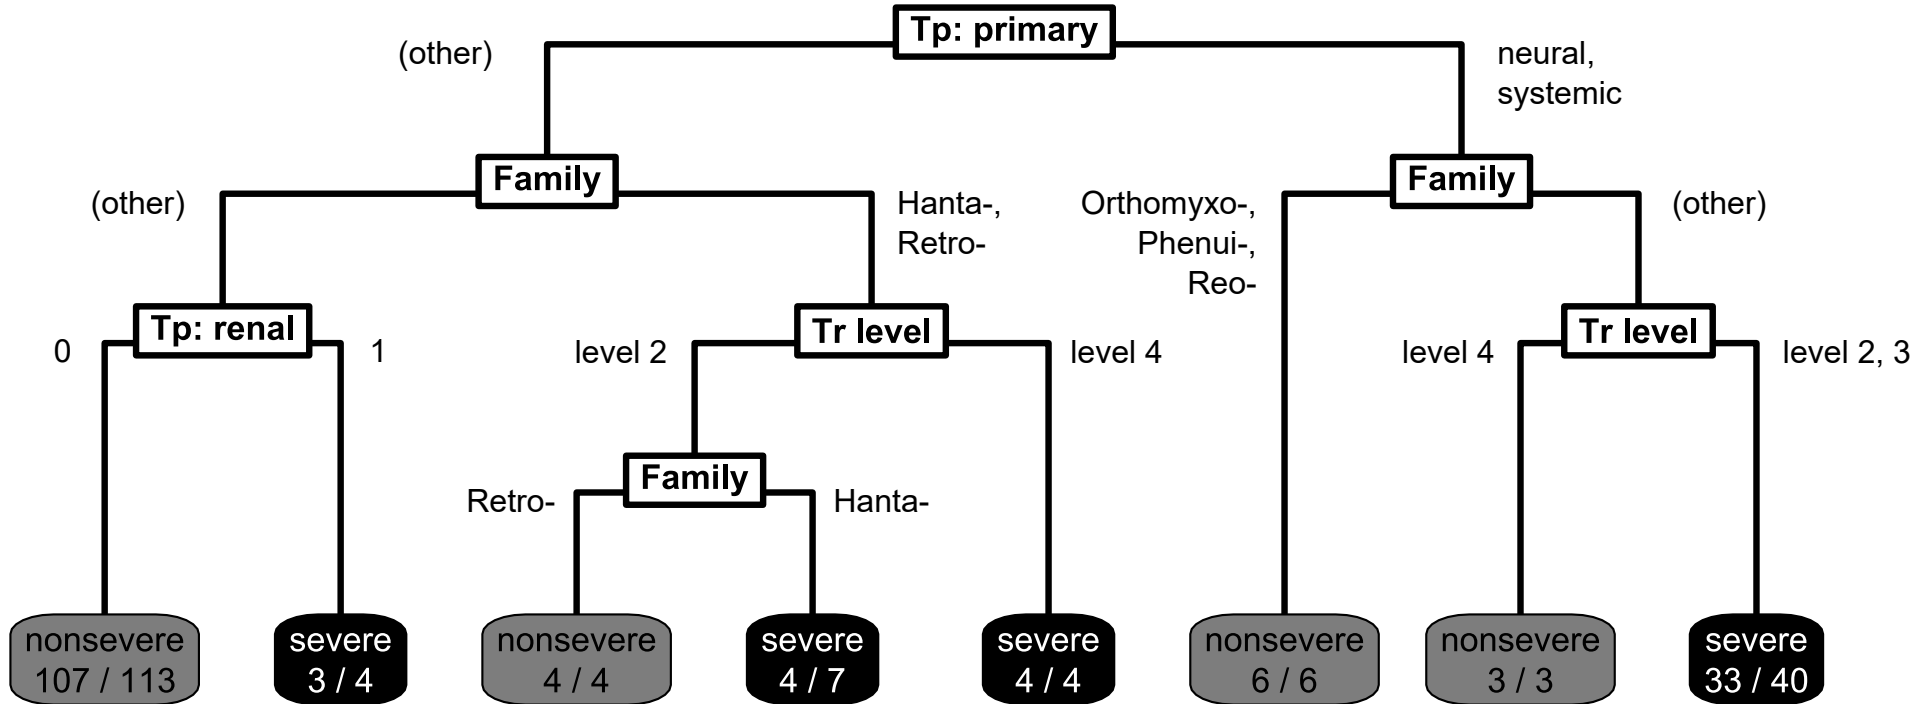

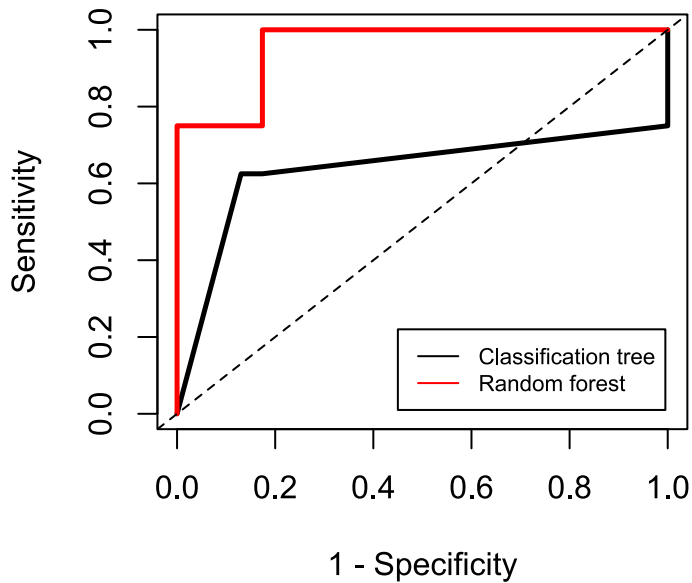

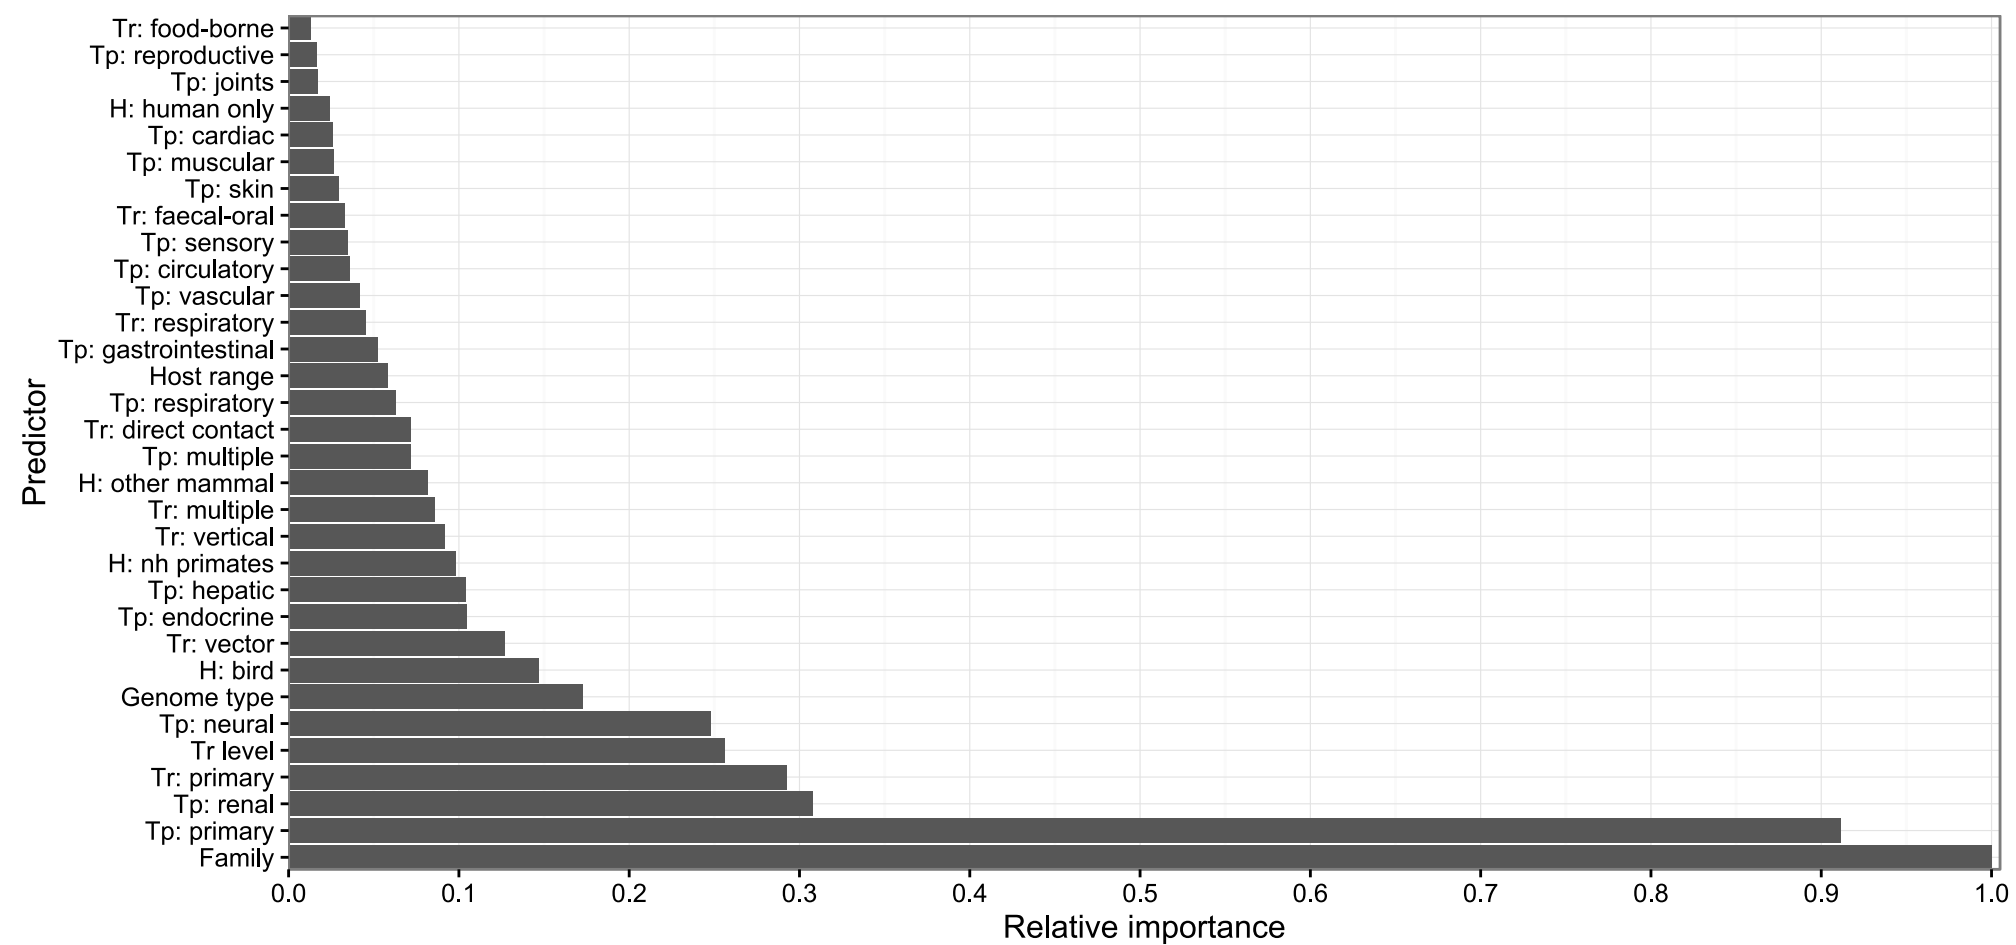



Predicted probability (severe)

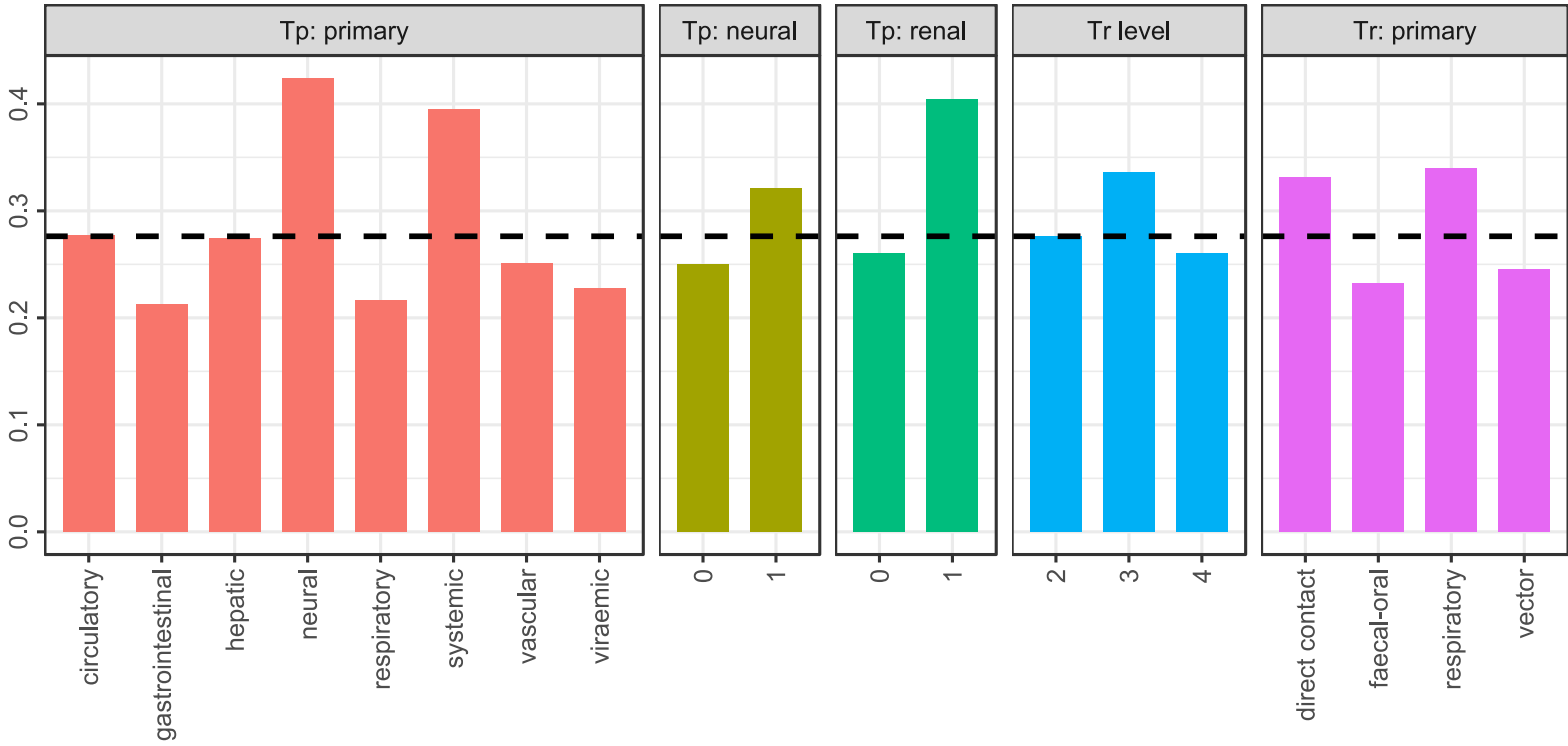

Source: https://www.biorxiv.org/content/biorxiv/early/2019/03/19/581512.1.full.pdf
